# Supplementary material for: Comparison of the Heights of Sporadic E Layers and Vertical Ion Convergence Parameters
Source: MDPI journal article supplement (doi:10.3390/rs15245674), 2023-12-08
Supplement: s1 [file s1]

Archive with 1 entries (1 files):
- remotesensing-2726572-supplementary.pdf
